# Supplementary material
Source: publisher figshare collection journal article supplement (https://asha.figshare.com/articles/dataset/_/21357669)
Supplement: Supplementary file 1 [file 1]

**Supplemental Material S2.** Treatment effect outcomes by care-partner status.

|                                                  | EMST                                                                  |                                                                        |                                                           | CST                                                      |                                                           |                                              |                                                          |                                                           |                                              |
|--------------------------------------------------|-----------------------------------------------------------------------|------------------------------------------------------------------------|-----------------------------------------------------------|----------------------------------------------------------|-----------------------------------------------------------|----------------------------------------------|----------------------------------------------------------|-----------------------------------------------------------|----------------------------------------------|
|                                                  |                                                                       |                                                                        |                                                           | Single Voluntary Cough                                   |                                                           |                                              | Sequential voluntary cough                               |                                                           |                                              |
|                                                  | pMEP<br>pre-<br>treatment<br>mean<br>cmH <sub>2</sub> O ( <i>SD</i> ) | pMEP<br>post-<br>treatment<br>mean<br>cmH <sub>2</sub> O ( <i>SD</i> ) | Magnitude<br>of Change<br>in pMEP<br>(cmH <sub>2</sub> O) | PEFR<br>pre-<br>treatment<br>mean<br>L/min ( <i>SD</i> ) | PEFR<br>post-<br>treatment<br>mean L/min<br>( <i>SD</i> ) | Magnitude<br>of Change<br>in PEFR<br>(L/min) | PEFR<br>pre-<br>treatment<br>mean<br>L/min ( <i>SD</i> ) | PEFR<br>post-<br>treatment<br>mean<br>L/min ( <i>SD</i> ) | Magnitude<br>of Change<br>in PEFR<br>(L/min) |
| Participants<br><b>with</b> a<br>Care-Partner    | 52.0 (21.5)                                                           | 65.6 (17.4)                                                            | 13.6                                                      | 245 (82.5)                                               | 322 (129)                                                 | 77                                           | 238 (82.8)                                               | 294 (125)                                                 | 56                                           |
| Participants<br><b>without</b> a<br>Care-Partner | 74.7 (22.8)                                                           | 102 (30.6)                                                             | 27.3                                                      | 322 (112)                                                | 368 (165)                                                 | 46                                           | 310 (106)                                                | 354 (126)                                                 | 44                                           |
