# Supplementary material
Source: publisher figshare collection journal article supplement (https://asha.figshare.com/articles/dataset/_/21357669)
Supplement: Supplementary file 2 [file 1]

**Supplemental Material S1.** Practical feasibility outcomes by care-partner status.

|                                            | <b>Demographics</b>             |                          | <b>EMST</b>                           |                                     |                                                       |                                                       | <b>CST</b>                             |                                      |                                                      |                                                      |
|--------------------------------------------|---------------------------------|--------------------------|---------------------------------------|-------------------------------------|-------------------------------------------------------|-------------------------------------------------------|----------------------------------------|--------------------------------------|------------------------------------------------------|------------------------------------------------------|
|                                            | <b>Disease duration (years)</b> | <b>MMSE Score (mean)</b> | <b>Initial MEP duration (minutes)</b> | <b>Final MEP duration (minutes)</b> | <b>EMST 1<sup>st</sup> session duration (minutes)</b> | <b>EMST 4<sup>th</sup> session duration (minutes)</b> | <b>Initial PEFR duration (minutes)</b> | <b>Final PEFR duration (minutes)</b> | <b>CST 1<sup>st</sup> session duration (minutes)</b> | <b>CST 4<sup>th</sup> session duration (minutes)</b> |
| Participants <b>with</b> a Care-Partner    | 5.44                            | 25.43                    | 10.93                                 | 6.17                                | 8.10                                                  | 9.89                                                  | 5.23                                   | 3.28                                 | 12.26                                                | 11.91                                                |
| Participants <b>without</b> a Care-Partner | 9.00*                           | 28.83                    | 10.03                                 | 4.61                                | 6.24                                                  | 4.98                                                  | 4.47                                   | 2.15                                 | 13.24                                                | 8.48                                                 |

\*One participant with cerebellar ataxia in the group of participants without a care-partner had a disease duration of 42 years. When excluding this participant, the mean disease duration for the group of participants without a care-partner was 6.00.
